# Supplementary material for: BRD4-Associated Chromatin Remodeling Signature Links Epigenetic Regulation to Immune Landscape in Ovarian Cancer
Source: Research Square preprint supplement (doi:10.21203/rs.3.rs-7030302/v1), 2025-07-18
Supplement: Supplementary file 1 [file 85ee8faceb4515ef0d62b099.docx]

**Supplementary Figure**

**
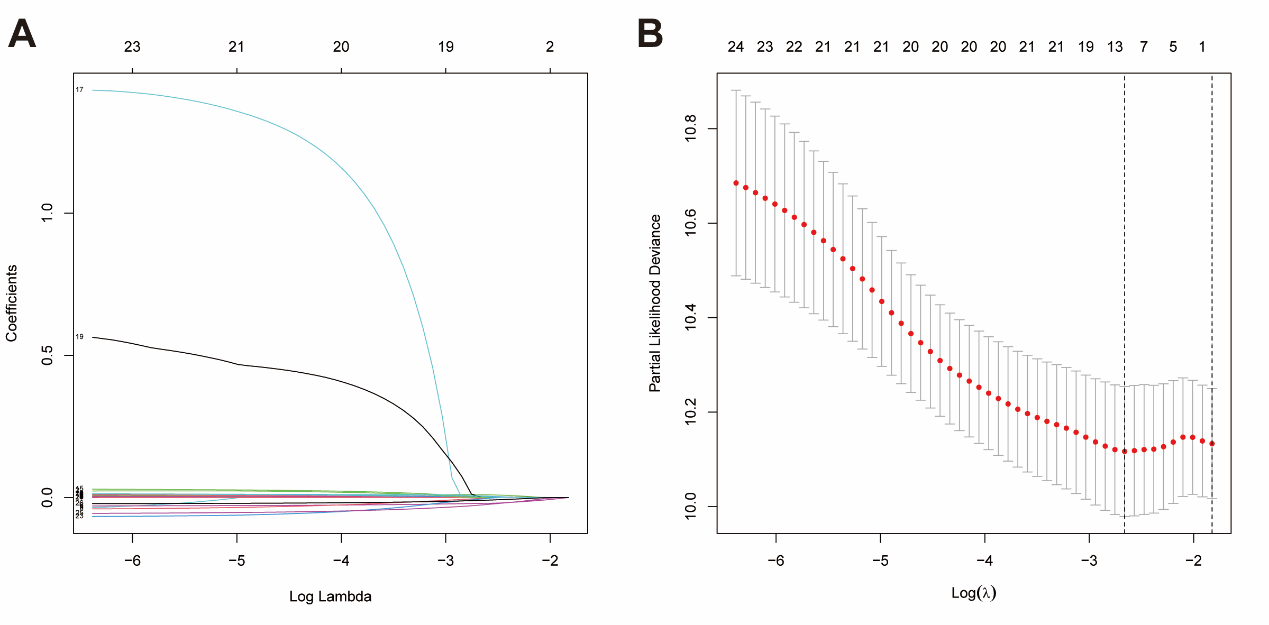
**

**Supplementary Figure S1**: Construction of a 11-gene signature model in the TCGA cohort. (A) LASSO coefficient profiles of the expression 26 candidate genes. (B) Selection of the penalty parameter (λ) in the LASSO model via 10-fold cross-validation. The dotted vertical lines are plotted at the optimal values following the minimum criteria (left) and “one standard error” criteria (right).


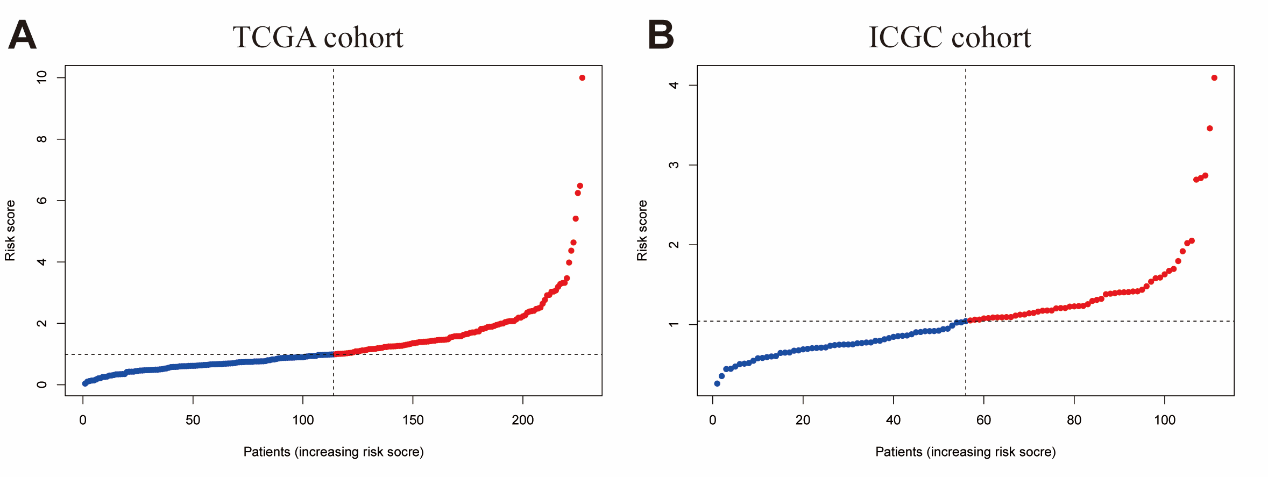
**Supplementary Figure S2**: The distribution and median value of the risk scores in the TCGA (A) and ICGC (B) cohorts.


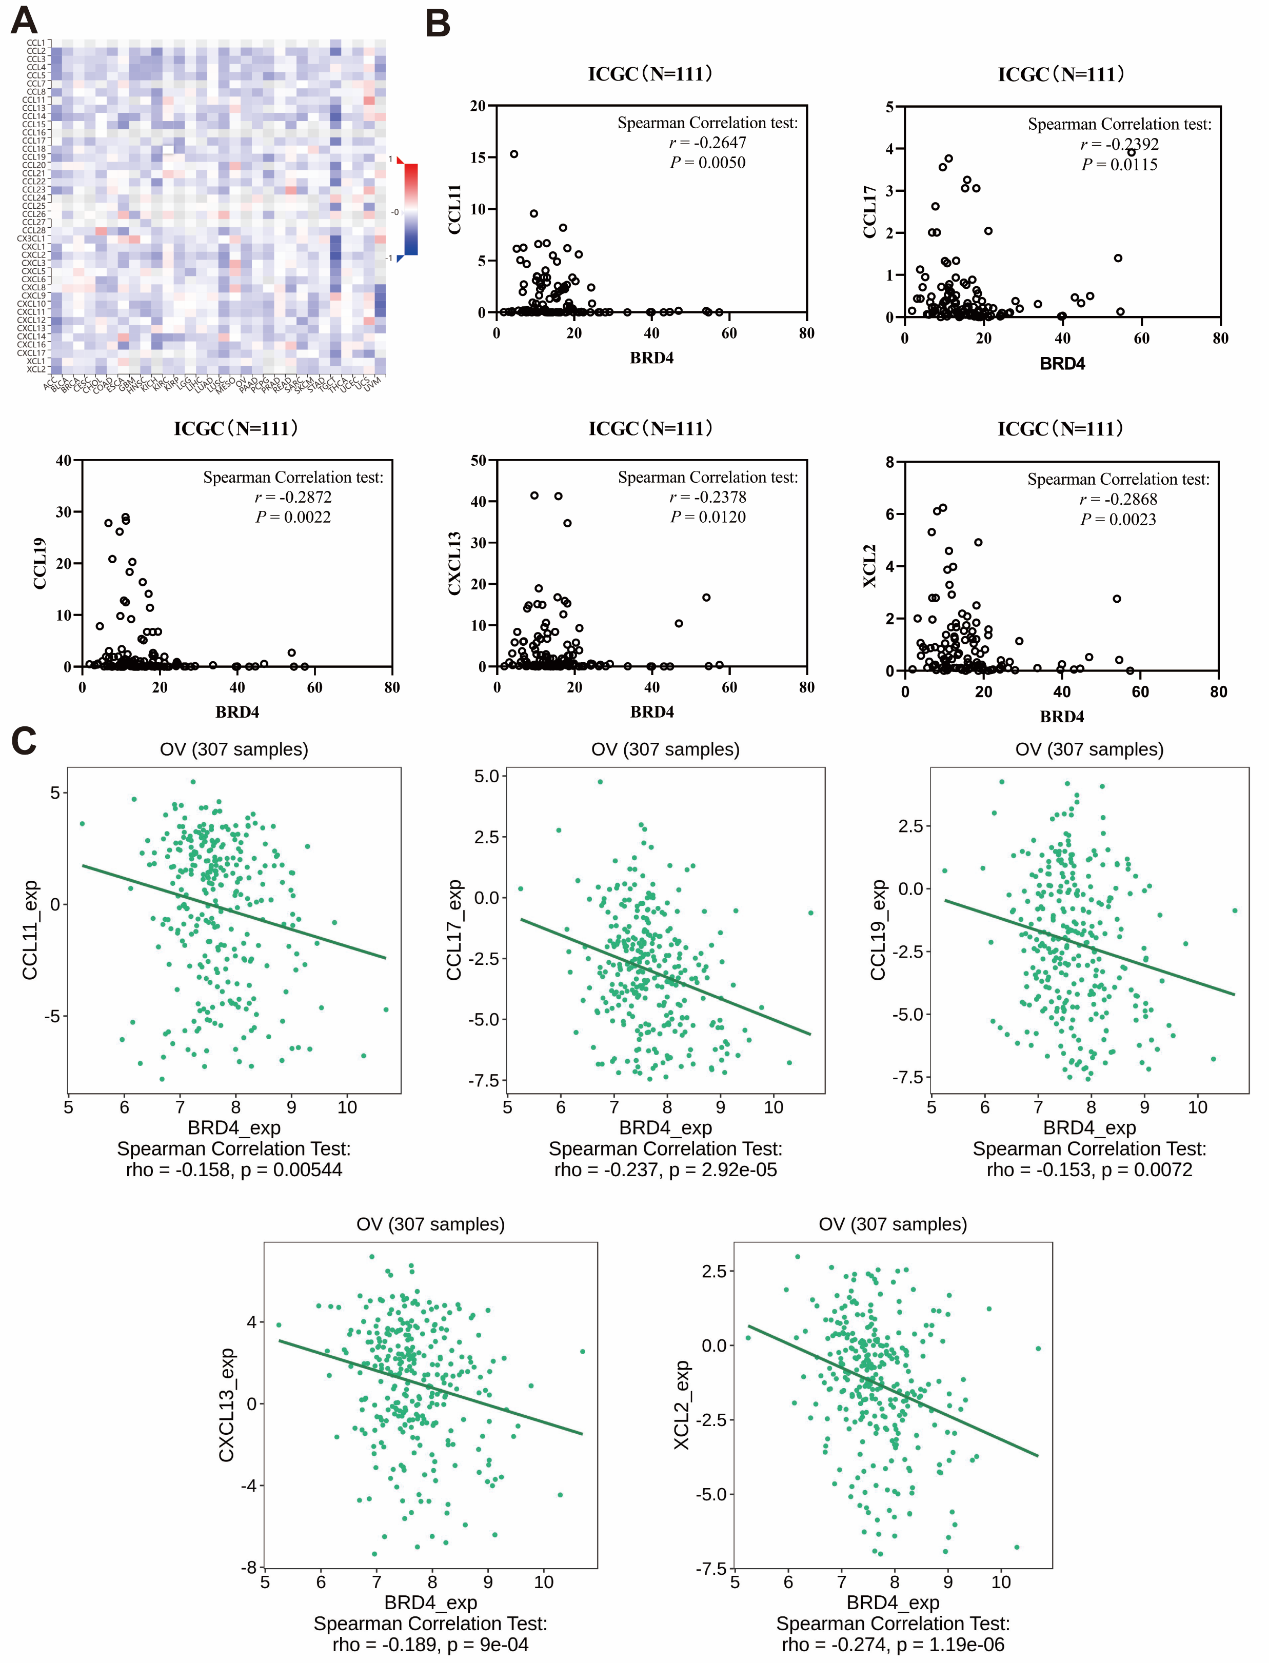
**Supplementary Figure S3:** Identification of the chemokines associated with BRD4 expression in TISIDB database and the TCGA and ICGC cohorts. (A) Correlation analysis of BRD4 expression and 41 chemokines in TISIDB database. (B) The five overlapping chemokines are all negatively correlated with BRD4 expression in the ICGC cohort. (C) The 5 overlapping chemokines are all negatively correlated with BRD4 expression in ovarian cancer in TISIDB database.

**Supplementary Table S1.** 870 chromatin regulator-related genes

| A1CF | CHMP1B | HIRIP3 | MST1 | RAC3 | TAF5 |
| --- | --- | --- | --- | --- | --- |
| ACTB | CHRAC1 | HJURP | MTA1 | RAD51 | TAF5L |
| ACTL6A | CHTOP | HLCS | MTA2 | RAD54B | TAF6 |
| ACTL6B | CHUK | HLTF | MTA3 | RAD54L | TAF6L |
| ACTR2 | CIC | HMG20A | MTF2 | RAD54L2 | TAF7 |
| ACTR3 | CIR1 | HMG20B | MUM1 | RAG1 | TAF8 |
| ACTR3B | CIT | HMGA1 | MYBBP1A | RAG2 | TAF9 |
| ACTR5 | CLNS1A | HMGA2 | MYO1C | RAI1 | TAF9B |
| ACTR6 | CLOCK | HMGB1 | MYSM1 | RARA | TBL1XR1 |
| ACTR8 | CRB2 | HMGB2 | NAA60 | RB1 | TCF4 |
| ADNP | CREBBP | HMGB3 | NAP1L1 | RBBP4 | TDG |
| AEBP2 | CSNK2A1 | HMGN1 | NAP1L2 | RBBP5 | TDRD1 |
| AHCTF1 | CSRP2BP | HMGN2 | NAP1L3 | RBBP7 | TDRD12 |
| AICDA | CTBP1 | HMGN3 | NAP1L4 | RBP1 | TDRD3 |
| AIRE | CTBP2 | HMGN4 | NAP1L5 | RBX1 | TDRD5 |
| AKAP1 | CTCF | HMGN5 | NASP | RCC1 | TDRD7 |
| ALKBH1 | CTCFL | HN1 | NAT10 | RCOR1 | TDRD9 |
| ALKBH3 | CTR9 | HN1L | NBN | RCOR2 | TDRKH |
| ANP32A | CUL1 | HNF1A | NCL | RCOR3 | TERF1 |
| ANP32B | CUL2 | HNRNPA1 | NCOA1 | REST | TERF2 |
| ANP32E | CUL3 | HP1BP3 | NCOA2 | REV1 | TET1 |
| APBB1 | CUL4A | HR | NCOA3 | RING1 | TET2 |
| APEX1 | CUL4B | HSPA1A | NCOA4 | RIT1 | TET3 |
| APOBEC1 | CUL5 | HUWE1 | NCOA5 | RLIM | TEX10 |
| APOBEC2 | CXXC1 | IDH1 | NCOA6 | RMI1 | TFDP1 |
| APOBEC3A | DAPK3 | IDH2 | NCOA7 | RNF168 | TFF1 |
| APOBEC3B | DAXX | IFIT3 | NCOR1 | RNF17 | TFPT |
| APOBEC3C | DBF4 | IGFBP7 | NCOR2 | RNF2 | TLE1 |
| APOBEC3D | DBF4B | IKBKAP | NEK6 | RNF20 | TLE2 |
| APOBEC3F | DDB1 | IKZF1 | NEK9 | RNF40 | TLE4 |
| APOBEC3G | DDB2 | IKZF3 | NFRKB | RNF8 | TLK1 |
| APOBEC3H | DDX21 | ING1 | NFYB | RPS6KA3 | TLK2 |
| ARID1A | DDX50 | ING2 | NFYC | RPS6KA4 | TNP1 |
| ARID1B | DEK | ING3 | NIPBL | RPS6KA5 | TNP2 |
| ARID2 | DHX30 | ING4 | NOC2L | RRP8 | TONSL |
| ARID3A | DIDO1 | ING5 | NPAS2 | RSAD1 | TOP2A |
| ARID3B | DMAP1 | INO80 | NPM1 | RSF1 | TOP2B |
| ARID3C | DNAJC1 | INO80B | NPM2 | RTF1 | TOPBP1 |
| ARID4A | DNAJC2 | INO80C | NSD1 | RUVBL1 | TOX |
| ARID4B | DND1 | INO80D | NSL1 | RUVBL2 | TOX2 |
| ARID5A | DNMT1 | INO80E | OGT | RYBP | TOX3 |
| ARID5B | DNMT3A | JADE1 | ORC1 | SAFB | TOX4 |
| ARNTL | DNMT3B | JADE2 | ORC2 | SAP130 | TP53 |
| ARRB1 | DNMT3L | JADE3 | PADI1 | SAP18 | TP53BP1 |
| ASCL1 | DNTT | JAK2 | PADI2 | SAP25 | TRDMT1 |
| ASCL2 | DNTTIP2 | JARID2 | PADI3 | SAP30 | TRIM16 |
| ASF1A | DOT1L | JDP2 | PADI4 | SAP30L | TRIM24 |
| ASF1B | DPF1 | JMJD1C | PAF1 | SATB1 | TRIM27 |
| ASH1L | DPF2 | JMJD4 | PAGR1 | SATB2 | TRIM28 |
| ASH2L | DPF3 | JMJD6 | PAK2 | SCMH1 | TRIM33 |
| ASXL1 | DPPA3 | JMJD7 | PARG | SCML1 | TRRAP |
| ASXL2 | DPY30 | JMJD8 | PARP1 | SCML2 | TSPY1 |
| ASXL3 | DR1 | KANSL1 | PARP2 | SCML4 | TSPYL1 |
| ATAD2 | DTX3L | KANSL2 | PARP3 | SENP1 | TSPYL2 |
| ATAD2B | DUSP1 | KANSL3 | PARP4 | SENP3 | TSPYL4 |
| ATF2 | DZIP3 | KAT2A | PATZ1 | SET | TSPYL5 |
| ATF7IP | E2F6 | KAT2B | PAXIP1 | SETBP1 | TSPYL6 |
| ATM | EED | KAT5 | PBK | SETD1A | TSSK6 |
| ATN1 | EHMT1 | KAT6A | PBRM1 | SETD1B | TTF2 |
| ATR | EHMT2 | KAT6B | PCGF1 | SETD2 | TTK |
| ATRX | EID1 | KAT7 | PCGF2 | SETD3 | TXN2 |
| ATXN7 | EID2 | KAT8 | PCGF3 | SETD4 | TYW5 |
| ATXN7L3 | EID2B | KDM1A | PCGF5 | SETD5 | UBE2A |
| AURKA | ELP2 | KDM1B | PCGF6 | SETD6 | UBE2B |
| AURKB | ELP3 | KDM2A | PCNA | SETD7 | UBE2D1 |
| AURKC | ELP4 | KDM2B | PDP1 | SETD8P1 | UBE2D3 |
| BABAM1 | ELP5 | KDM3A | PDS5A | SETD9 | UBE2E1 |
| BAG6 | ELP6 | KDM3B | PDS5B | SETDB1 | UBE2H |
| BAHD1 | EMSY | KDM4A | PELP1 | SETDB2 | UBE2N |
| BANF1 | ENY2 | KDM4B | PES1 | SETMAR | UBE2T |
| BANF2 | EP300 | KDM4C | PHC1 | SF3B1 | UBN1 |
| BANP | EP400 | KDM4D | PHC2 | SF3B3 | UBR2 |
| BAP1 | EPC1 | KDM4E | PHC3 | SFMBT1 | UBR5 |
| BARD1 | EPC2 | KDM5A | PHF1 | SFMBT2 | UBR7 |
| BAZ1A | ERBB4 | KDM5B | PHF10 | SFPQ | UBTF |
| BAZ1B | ERCC6 | KDM5C | PHF12 | SGF29 | UCHL5 |
| BAZ2A | ERCC6L | KDM5D | PHF13 | SHPRH | UHRF1 |
| BAZ2B | ERCC6L2 | KDM6A | PHF14 | SIN3A | UHRF2 |
| BBX | EXOSC1 | KDM6B | PHF19 | SIN3B | UIMC1 |
| BCL10 | EXOSC2 | KDM7A | PHF2 | SIRT1 | UNK |
| BCOR | EXOSC3 | KDM8 | PHF20 | SIRT2 | USP11 |
| BCORL1 | EXOSC4 | KEAP1 | PHF20L1 | SIRT3 | USP12 |
| BMI1 | EXOSC5 | KMT2A | PHF21A | SIRT4 | USP15 |
| BOD1 | EXOSC6 | KMT2B | PHF21B | SIRT5 | USP16 |
| BPTF | EXOSC7 | KMT2C | PHF23 | SIRT6 | USP17L2 |
| BRCA1 | EXOSC8 | KMT2D | PHF3 | SIRT7 | USP21 |
| BRCA2 | EXOSC9 | KMT2E | PHF6 | SKP1 | USP22 |
| BRCC3 | EYA1 | KMT5A | PHF7 | SLF1 | USP3 |
| BRD1 | EYA2 | KMT5B | PHF8 | SMARCA1 | USP36 |
| BRD2 | EYA3 | KMT5C | PHIP | SMARCA2 | USP44 |
| BRD3 | EYA4 | L3MBTL1 | PIWIL4 | SMARCA4 | USP46 |
| BRD4 | EZH1 | L3MBTL2 | PKM | SMARCA5 | USP49 |
| BRD7 | EZH2 | L3MBTL3 | PKN1 | SMARCAD1 | USP7 |
| BRD8 | FAM175A | L3MBTL4 | POGZ | SMARCAL1 | UTY |
| BRD9 | FAM175B | LAS1L | POLE3 | SMARCB1 | VDR |
| BRDT | FBL | LBR | PPARGC1A | SMARCC1 | VEZF1 |
| BRE | FBRS | LEO1 | PPM1G | SMARCC2 | VPS72 |
| BRMS1 | FBRSL1 | LMNA | PPP2CA | SMARCD1 | VRK1 |
| BRMS1L | FBXL19 | LMNB1 | PPP4C | SMARCD2 | WAC |
| BRPF1 | FMR1 | LMNB2 | PPP4R2 | SMARCD3 | WDR5 |
| BRPF3 | FOXA1 | LRWD1 | PPP4R3A | SMARCE1 | WDR77 |
| BRWD1 | FOXO1 | MAP3K7 | PPP4R3B | SMC1A | WDR82 |
| BRWD3 | FOXP1 | MAPKAPK3 | PPP4R3CP | SMCHD1 | WHSC1 |
| BTAF1 | FOXP2 | MASTL | PRC1 | SMYD1 | WHSC1L1 |
| BUB1 | FOXP3 | MAX | PRDM1 | SMYD2 | WSB2 |
| C14orf169 | FOXP4 | MAZ | PRDM10 | SMYD3 | XRCC1 |
| C17orf49 | FTO | MBD1 | PRDM11 | SMYD4 | YAF2 |
| CARM1 | FXR1 | MBD2 | PRDM12 | SMYD5 | YEATS2 |
| CBX1 | FXR2 | MBD3 | PRDM13 | SNAI2 | YEATS4 |
| CBX2 | GABRG1 | MBD4 | PRDM14 | SND1 | YWHAB |
| CBX3 | GADD45A | MBD5 | PRDM15 | SP1 | YWHAE |
| CBX4 | GADD45B | MBD6 | PRDM16 | SP100 | YWHAZ |
| CBX5 | GADD45G | MBIP | PRDM2 | SP110 | YY1 |
| CBX6 | GATAD1 | MBTD1 | PRDM4 | SP140 | ZBTB16 |
| CBX7 | GATAD2A | MCRS1 | PRDM5 | SPEN | ZBTB24 |
| CBX8 | GATAD2B | MDC1 | PRDM6 | SPOP | ZBTB33 |
| CDC6 | GFI1 | MDM2 | PRDM7 | SRCAP | ZBTB38 |
| CDC73 | GFI1B | MDM4 | PRDM8 | SRRM2 | ZBTB4 |
| CDK1 | GLYATL1 | MEAF6 | PRDM9 | SRSF1 | ZBTB7C |
| CDK17 | GLYR1 | MECOM | PRKAA1 | SRSF3 | ZCWPW1 |
| CDK2 | GSE1 | MECP2 | PRKAA2 | SS18L1 | ZCWPW2 |
| CDK3 | GSG2 | MEN1 | PRKAB1 | SS18L2 | ZFAT |
| CDK5 | GTF2I | MGA | PRKAB2 | SSRP1 | ZFP57 |
| CDK7 | GTF3C1 | MGEA5 | PRKAG1 | STK31 | ZGPAT |
| CDK9 | GTF3C4 | MGMT | PRKAG2 | STK4 | ZHX1 |
| CDY1 | HAT1 | MIER1 | PRKAG3 | SUDS3 | ZHX2 |
| CDY2A | HBP1 | MIER2 | PRKCA | SUPT16H | ZHX3 |
| CDYL | HCFC1 | MIER3 | PRKCB | SUPT3H | ZMYM1 |
| CDYL2 | HCFC2 | MINA | PRKCD | SUPT6H | ZMYM2 |
| CECR2 | HDAC1 | MIS18BP1 | PRKDC | SUPT7L | ZMYM3 |
| CENPC | HDAC10 | MLLT1 | PRMT1 | SUV39H1 | ZMYM4 |
| CHAF1A | HDAC11 | MLLT10 | PRMT2 | SUV39H2 | ZMYM5 |
| CHAF1B | HDAC2 | MLLT3 | PRMT3 | SUZ12 | ZMYM6 |
| CHD1 | HDAC3 | MLLT6 | PRMT5 | SYNCRIP | ZMYND11 |
| CHD1L | HDAC4 | MOCS1 | PRMT6 | TADA1 | ZMYND8 |
| CHD2 | HDAC5 | MORF4 | PRMT7 | TADA2A | ZNF217 |
| CHD3 | HDAC6 | MORF4L1 | PRMT8 | TADA2B | ZNF516 |
| CHD4 | HDAC7 | MORF4L2 | PRMT9 | TADA3 | ZNF532 |
| CHD5 | HDAC8 | MOV10 | PRPF31 | TAF1 | ZNF541 |
| CHD6 | HDAC9 | MPHOSPH8 | PRR12 | TAF10 | ZNF592 |
| CHD7 | HDGF | MRGBP | PRR14 | TAF12 | ZNF687 |
| CHD8 | HELLS | MSH6 | PSIP1 | TAF1L | ZNF711 |
| CHD9 | HIF1AN | MSL1 | PWWP2B | TAF2 | ZNHIT1 |
| CHEK1 | HINFP | MSL2 | PYGO1 | TAF3 | ZRANB3 |
| CHMP1A | HIRA | MSL3 | PYGO2 | TAF4 | ZZZ3 |

**Supplementary Table S2**. The annotated gene set file used in ssGSEA

| 1. aDCs | | | | | |
| --- | --- | --- | --- | --- | --- |
| C10orf54 | CD274 | LGALS9 | PDCD1LG2 | PVRL3 |  |
| 1. B_cells | | | | | |
| BACH2 | BANK1 | BLK | BTLA | CD79A | CD79B |
| FCRL1 | FCRL3 | HVCN1 | RALGPS2 |  |  |
| 1. CD8+_T_cells | | | | | |
| CD8A |  |  |  |  |  |
| 1. DCs | | | | | |
| CCL17 | CCL22 | CD209 | CCL13 |  |  |
| 1. iDCs | | | | | |
| CD1A | CD1E |  |  |  |  |
| 1. Macrophages | | | | | |
| C11orf45 | CD68 | CLEC5A | CYBB | FUCA1 | GPNMB |
| HS3ST2 | LGMN | MMP9 | TM4SF19 |  |  |
| 1. Mast_cells | | | | | |
| CMA1 | MS4A2 | TPSAB1 |  |  |  |
| 1. Neutrophils | | | | | |
| EVI2B | HSD17B11 | KDM6B | MEGF9 | MNDA | NLRP12 |
| PADI4 | SELL | TRANK1 | VNN3 |  |  |
| 1. NK_cells | | | | | |
| KLRC1 | KLRF1 |  |  |  |  |
| 1. pDCs | | | | | |
| CLEC4C | CXCR3 | GZMB | IL3RA | IRF7 | IRF8 |
| LILRA4 | PHEX | PLD4 | PTCRA |  |  |
| 1. T_helper_cells | | | | | |
| CD4 |  |  |  |  |  |
| 1. Tfh | | | | | |
| PDCD1 | CXCL13 | CXCR5 |  |  |  |
| 1. Th1_cells | | | | | |
| IFNG | TBX21 | CTLA4 | STAT4 | CD38 | IL12RB2 |
| LTA | CSF2 |  |  |  |  |
| 1. Th2_cells | | | | | |
| PMCH | LAIR2 | SMAD2 | CXCR6 | GATA3 | IL26 |
| 1. TIL | | | | | |
| ITM2C | CD38 | THEMIS2 | GLYR1 | ICOS | F5 |
| TIGIT | KLRD1 | IRF4 | PRKCQ | FCRL5 | SIRPG |
| LPXN | IL2RG | CCL5 | LCK | TRAF3IP3 | CD86 |
| MAL | LILRB1 | DOK2 | CD6 | PAG1 | LAX1 |
| PLEK | PIK3CD | SLAMF1 | XCL1 | GPR171 | XCL2 |
| TBX21 | CD2 | CD53 | KLHL6 | SLAMF6 | CD40 |
| SIT1 | TNFRSF4 | CD79A | CD247 | LCP2 | CD3D |
| CD27 | SH2D1A | FYB | ARHGAP30 | ACAP1 | CST7 |
| CD3G | IL2RB | CD3E | FCRL3 | CORO1A | ITK |
| TCL1A | CYBB | CSF2RB | IKZF1 | NCF4 | DOCK2 |
| CCR2 | PTPRC | PLAC8 | NCKAP1L | IL7R | CD28 |
| STAT4 | CD8A | LY9 | CD48 | HCST | PTPRCAP |
| SASH3 | ARHGAP25 | LAT | TRAT1 | IL10RA | PAX5 |
| CCR7 | DOCK11 | PARVG | SPNS1 | CD52 | HCLS1 |
| ARHGAP9 | GIMAP6 | PRKCB | MS4A1 | GPR18 | TBC1D10C |
| GVINP1 | P2RY8 | EVI2B | VAMP5 | KLRK1 | SELL |
| MPEG1 | MS4A6A | ARHGAP15 | MFNG | GZMK | SELPLG |
| TARP | GIMAP7 | FAM65B | INPP5D | ITGA4 | MZB1 |
| GPSM3 | STK10 | CLEC2D | IL16 | NLRC3 | GIMAP5 |
| GIMAP4 | IFFO1 | CFH | PVRIG | CFHR1 |  |
| 1. Treg | | | | | |
| IL12RB2 | TMPRSS6 | CTSC | LAPTM4B | TFRC | RNF145 |
| NETO2 | ADAT2 | CHST2 | CTLA4 | NFE2L3 | LIMA1 |
| IL1R2 | ICOS | HSDL2 | HTATIP2 | FKBP1A | TIGIT |
| CCR8 | LTA | SLC35F2 | IL21R | AHCYL1 | SOCS2 |
| ETV7 | BCL2L1 | RRAGB | ACSL4 | CHRNA6 | BATF |
| LAX1 | ADPRH | TNFRSF4 | ANKRD10 | CD274 | CASP1 |
| LY75 | NPTN | SSTR3 | GRSF1 | CSF2RB | TMEM184C |
| NDFIP2 | ZBTB38 | ERI1 | TRAF3 | NAB1 | HS3ST3B1 |
| LAYN | JAK1 | VDR | LEPROT | GCNT1 | PTPRJ |
| IKZF2 | CSF1 | ENTPD1 | TNFRSF18 | METTL7A | KSR1 |
| SSH1 | CADM1 | IL1R1 | ACP5 | CHST7 | THADA |
| CD177 | NFAT5 | ZNF282 | MAGEH1 |  |  |
| 1. APC_co_inhibition | | | | | |
| C10orf54 | CD274 | LGALS9 | PDCD1LG2 | PVRL3 |  |
| 1. APC_co_stimulation | | | | | |
| CD40 | CD58 | CD70 | ICOSLG | SLAMF1 | TNFSF14 |
| TNFSF15 | TNFSF18 | TNFSF4 | TNFSF8 | TNFSF9 |  |
| 1. CCR | | | | | |
| CCL16 | IL1R1 | IL16 | IL12RB2 | CCRL2 | CCL14 |
| TPO | CXCR4 | IL1RL1 | CCL1 | IFNA10 | IFNA21 |
| TGFBR2 | CXCR2P1 | ILK | IL17RA | TNFRSF17 | TNFSF18 |
| CXCL2 | TGFB1I1 | CCL25 | CCR1 | IFNA13 | CCL8 |
| CCL14 | IFNGR1 | ILDR2 | IL1RN | IL20 | IL17RB |
| TGFBR3 | IL9R | CXCR1 | TNFRSF11B | IL18BP | TNFRSF25 |
| IL11RA | IL1RAPL1 | IL36RN | TNFRSF14 | CCL3L1 | IL22 |
| CCL11 | IL11 | IL34 | IL13 | TNFSF12 | IL10RB |
| IL4I1 | CSF1 | TGFB1 | IL2RB | IL5 | IFNAR2 |
| IL33 | IL20RA | IFNG | BMP8B | IL23R | CCL18 |
| CXCL12 | IL25 | IL19 | CCL2 | IL26 | IFNA16 |
| CXCL10 | TNFRSF4 | ILKAP | IL24 | TNF | CSF2RB |
| BMPER | IL18 | BMP2K | IL18RAP | TGFA | IL36A |
| BMP8A | ILF3 | CCR10 | TGFBI | CSF2 | TNFAIP3 |
| CXCL11 | CCL20 | ILDR1 | TNFSF10 | IL1F10 | IL13RA2 |
| IL21R | TNFRSF12A | EPO | TNFRSF11A | CXCL17 | IL13RA1 |
| IL17B | IL6ST | CCR7 | CXCL5 | TNFSF13 | CCR9 |
| TNFRSF9 | CXCL13 | IL17C | IL5RA | IFNA4 | TNFRSF10A |
| ILF2 | IL12B | IL23A | TNFSF9 | IL37 | IFNA7 |
| CX3CR1 | TNFRSF8 | CCR5 | IL1RL2 | IL12A | IFNW1 |
| CCR8 | IL6R | IL7 | TNFRSF13C | IL7R | XCL2 |
| TNFSF12 | BMPR2 | EPOR | IL36G | IFNA1 | TNFSF14 |
| CSF3 | IFNE | CCL13 | IL15RA | IL1A | CCR2 |
| TNFSF4 | IL1RAPL2 | IL2RG | TNFRSF21 | IL4 | BMP15 |
| BMP3 | IL3RA | IL31RA | CXCL8 | IL2 | BMP10 |
| CX3CL1 | BMP4 | TNFAIP6 | IL22RA2 | CCL22 | CCL15 |
| BMP5 | CCL24 | IFNL2 | TNFAIP8L2 | CSF3R | TGFBR1 |
| CXCR2 | TNFSF13B | BMP1 | IL18R1 | IL10 | IFNA5 |
| TNFRSF10D | CCR4 | IL12RB1 | IFNLR1 | IFNK | BMP7 |
| BMP2 | IL2RA | TNFAIP8 | CXCR6 | TGFB2 | IFNA14 |
| CXCL14 | IL32 | IL4R | CCL3L3 | IL1R2 | IL20RB |
| CCL28 | TNFRSF10C | TNFRSF6B | TNFRSF1A | IL1B | IL10RA |
| CXCL3 | IL22RA1 | TNFAIP8L1 | IL17RE | IL17F | IFNA17 |
| BMP6 | BMPR1A | TNFRSF10B | IFNGR2 | IL27RA | CCR6 |
| CCL21 | CXCR5 | IFNL3 | IL17RC | IL15 | TGFB3 |
| CXCL9 | CXCR3 | CCL5 | TNFAIP8L3 | TNFSF8 | CCL15 |
| CCL23 | IFNA8 | CXCL6 | ILVBL | IL36B | CCL4 |
| IL6 | IL17REL | CXCL1 | TGFBRAP1 | XCL1 | CCL27 |
| TNFRSF18 | IFNB1 | CCR3 | CCL4L1 | CXCL16 | TNFRSF13B |
| IL17RD | IFNAR1 | TNFSF11 | CSF2RA | TNFRSF19 | TNFSF13 |
| IL17D | TNFRSF1B | CSF1R | CCRN4L | IL3 | CCL14 |
| IL27 | CCL17 | IL21 | CCL26 | CCL3 |  |
| CCL7 | IFNL1 | IL1RAP | TNFAIP1 | IFNA2 |  |
| 1. Check-point | | | | | |
| IDO1 | CD70 | TNFSF15 | CD244 | CD48 | TNFRSF18 |
| LAG3 | TNFSF9 | TNFRSF14 | CD274 | TNFRSF25 | BTNL2 |
| CTLA4 | ICOSLG | IDO2 | HAVCR2 | CD40LG | C10orf54 |
| TNFRSF9 | KIR3DL1 | CD276 | CD27 | ADORA2A | CD200R1 |
| ICOS | CD86 | CD40 | BTLA | VTCN1 | TNFSF4 |
| CD80 | PDCD1 | TNFRSF4 | LGALS9 | CD160 | CD200 |
| PDCD1LG2 | LAIR1 | TNFSF14 | TMIGD2 | CD44 | NRP1 |
| TIGIT | TNFRSF8 | HHLA2 | CD28 | TNFSF18 |  |
| 1. Cytolytic_activity | | | | | |
| PRF1 | GZMA |  |  |  |  |
| 1. HLA | | | | | |
| HLA-E | HLA-DPB2 | HLA-C | HLA-J | HLA-DQB1 | HLA-DQB2 |
| HLA-DQA2 | HLA-DQA1 | HLA-A | HLA-DMA | HLA-DOB | HLA-DRB1 |
| HLA-H | HLA-B | HLA-DRB5 | HLA-DOA | HLA-DPB1 | HLA-DRA |
| HLA-DRB6 | HLA-L | HLA-F | HLA-G | HLA-DMB | HLA-DPA1 |
| 1. Inflammation-promoting | | | | | |
| CCL5 | CD19 | CD8B | CXCL10 | CXCL13 | CXCL9 |
| GNLY | GZMB | IFNG | IL12A | IL12B | IRF1 |
| PRF1 | STAT1 | TBX21 |  |  |  |
| 1. MHC_class_I | | | | | |
| B2M | HLA-A | TAP1 |  |  |  |
| 1. Parainflammation | | | | | |
| CXCL10 | ICAM1 | MX1 | SCARB1 | OAS2 | NOX1 |
| PLAT | MX2 | HMOX1 | CD14 | REL | PLA2G2A |
| CCND1 | CXCL9 | CD276 | BLNK | OAS3 | IFIT1 |
| LGMN | ANXA1 | TIRAP | IFIT3 | CD44 | IFITM3 |
| PLAUR | TLR2 | IL33 | RETNLB | PPARG | IL1RN |
| AIM2 | PLA2G2D | PTGES | IFIT2 | BST2 |  |
| MMP7 | ITGA2 | TNFRSF12A | ISG15 | OAS1 |  |
| 1. T_cell_co-inhibition | | | | | |
| BTLA | C10orf54 | CD160 | CD244 | CD274 | CTLA4 |
| HAVCR2 | LAG3 | LAIR1 | TIGIT |  |  |
| 1. T_cell_co-stimulation | | | | | |
| CD2 | CD226 | CD27 | CD28 | CD40LG | ICOS |
| SLAMF1 | TNFRSF18 | TNFRSF25 | TNFRSF4 | TNFRSF8 | TNFRSF9 |
| TNFSF14 |  |  |  |  |  |
| 1. Type_I_IFN_Reponse | | | | | |
| DDX4 | IFIT1 | IFIT2 | IFIT3 | IRF7 | ISG20 |
| MX1 | MX2 | RSAD2 | TNFSF10 |  |  |
| 1. Type_II_IFN_Reponse | | | | | |
| GPR146 | SELP | AHR |  |  |  |

**Supplementary Table S3.** Clinical characteristics of the OV patients used in this study

|  | TCGA Cohort | ICGC Cohort |
| --- | --- | --- |
| No. of patients | 228 | 111 |
| Age(median, range) | 58(34-87) | 59(39-78) |
| Grade(%) |  |  |
| Grade 1 | 1(0.4%) | NA |
| Grade 2  Grade 3  Grade 4  unknow  Stage(%)  I  II  III  IV  unknow  Survival status  OS days(median, range)  Censored(%) | 26(11.4%)  193(84.6%)  1(0.4%)  7(3.1%)  0(0.0%)  16(7.0%)  181(79.4%)  29(12.7%)  2(0.9%)  914(9-5481)  1(0.4%) | NA  NA  NA  NA  0(0.0%)  0(0.0%)  79(71.2%)  14(12.6%)  18(16.2%)  972(133-6139)  0(0.0%) |

NA, not applicable.

**Supplementary Table S4.** Correlation between clinicopathological variables between BRD4high and BRD4low groups

|  |  | | Group | |  |
| --- | --- | --- | --- | --- | --- |
| Variables | Overall | BRD4-High | | BRD4-Low | *P*-value |
| **No. of patients** | 126 | 70(55.6%) | | 56(44.4%) |  |
| **Age(years, mean ± SD)** | 51.92**±**10.02 | 51.67**±**9.79 | | 52.23 **±**10.39 | 0.756 |
| **Histology** |  |  | |  | >0.999 |
| Clear cell carcinoma | 2 | 1 | | 1 |  |
| Endometrioid carcinoma | 3 | 2 | | 1 |  |
| Serous carcinoma | 121 | 67 | | 54 |  |
| **FIGO Stage** |  |  | |  | 0.002 |
| I+II | 42 | 15 | | 27 |  |
| III+ IV | 84 | 55 | | 29 |  |
| **Grade** |  |  | |  | 0.793 |
| G1 | 2 | 1 | | 1 |  |
| G2 | 39 | 20 | | 19 |  |
| G3 | 85 | 49 | | 36 |  |
| **Lymph node metastasis** |  |  | |  | 0.034 |
| No | 77 | 37 | | 40 |  |
| Yes | 49 | 33 | | 16 |  |
| **Distant metastasis** |  |  | |  | 0.017 |
| No | 109 | 56 | | 53 |  |
| Yes | 17 | 14 | | 3 |  |
| **CA125(U/ml)** | 1057.70 [436.88, 2083.25] | 1203.50 [683.75, 2,150.25] | | 861.00 [268.33, 2,086.50] | 0.035 |
